# Supplementary material for: Concave Ni(OH)2 Nanocube Synthesis and Its Application in High-Performance Hybrid Capacitors
Source: MDPI journal article supplement (doi:10.3390/nano13182538), 2023-09-11
Supplement: s1 [file s1]

## Supporting Information

# Concave Ni(OH)<sub>2</sub> Nanocube Synthesis and Its Application in High-Performance Hybrid Capacitors

Nan Cong <sup>1</sup>, Pan Li <sup>2</sup>, Xuyun Guo <sup>3</sup> and Xiaojuan Chen <sup>1,\*</sup>

<sup>1</sup> Beijing Academy of Quantum Information Sciences, Beijing 100193, China

<sup>2</sup> Institute of Analysis and Testing, Beijing Academy of Science and Technology, Beijing 100089, China

<sup>3</sup> Centre for Research on Adaptive Nanostructures and Nanodevices (CRANN) & Advanced Materials Bio-Engineering Research Centre (AMBER), School of Chemistry, Trinity College Dublin, D02PN40 Dublin, Ireland

\* Correspondence: chenxj@baqis.ac.cn

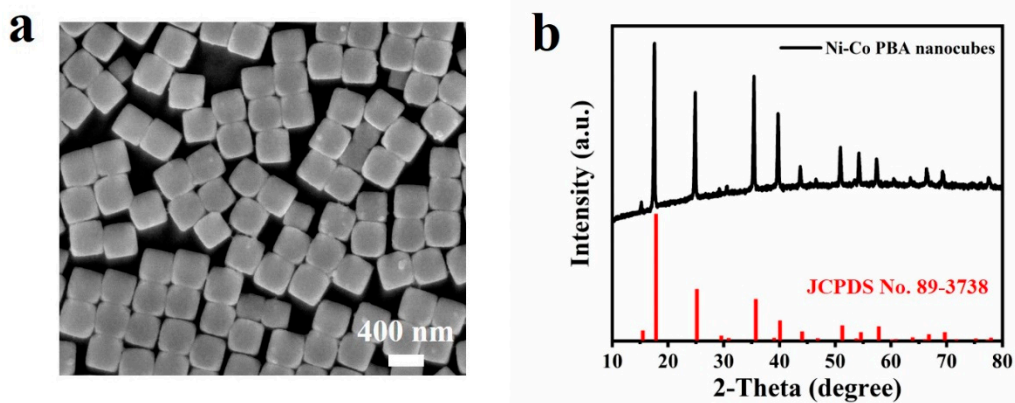

Figure S1. (a) SEM image and (b) XRD pattern of Ni-Co PBAs nanocubes with a size of 400 nm.

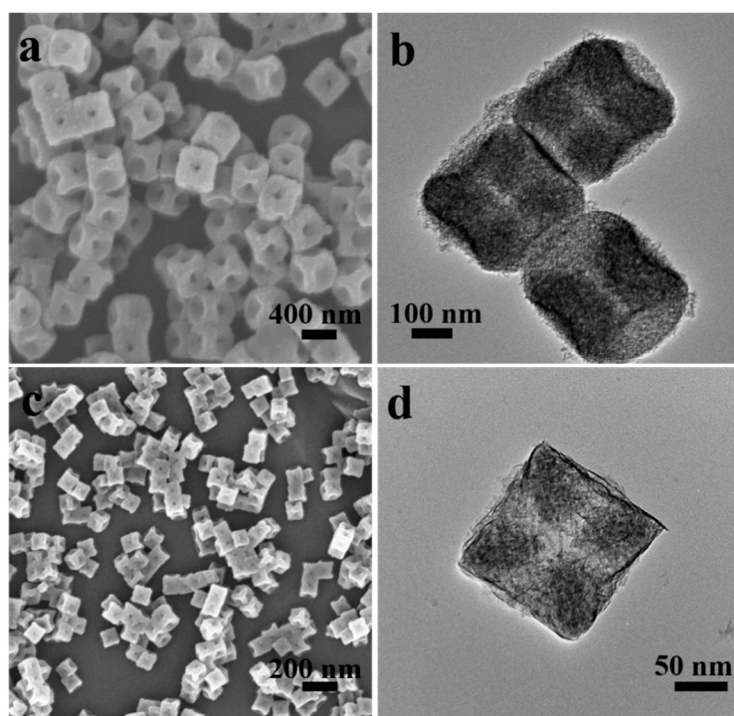

Figure S2. SEM images and TEM images of concave  $\text{Ni}(\text{OH})_2$  nanocubes with average size of (a,b) 350 nm and (c,d) 100 nm, respectively.

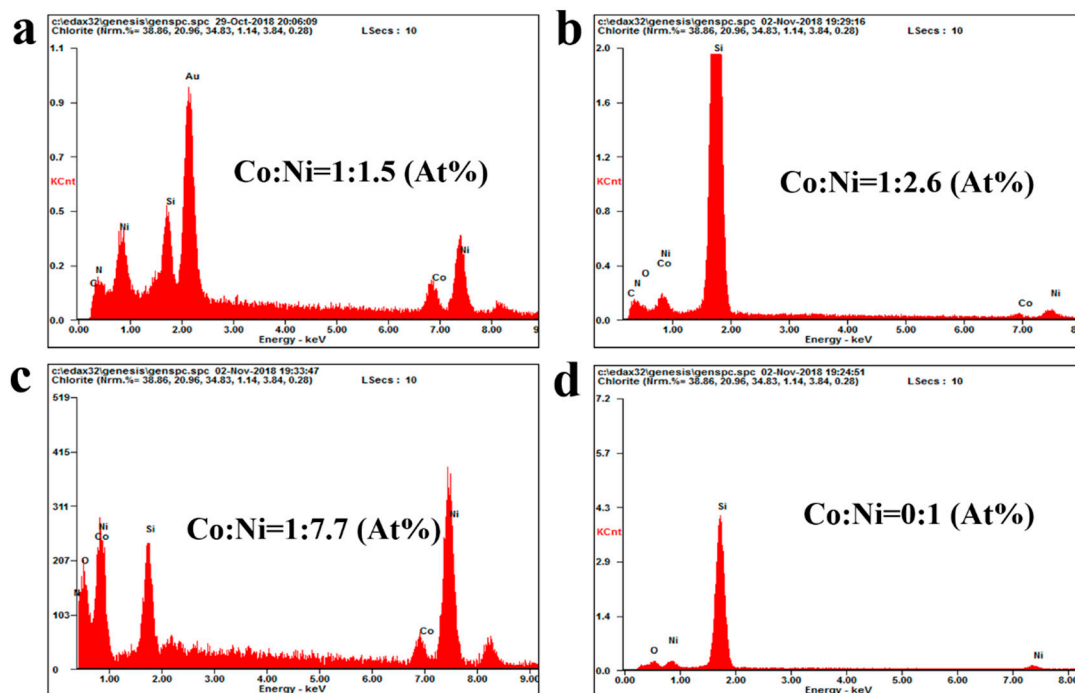

Figure S3. EDS spectra of the as-obtained products after reaction for 0 h (a), 1 h (b), 3 h (c), and 6 h (d).

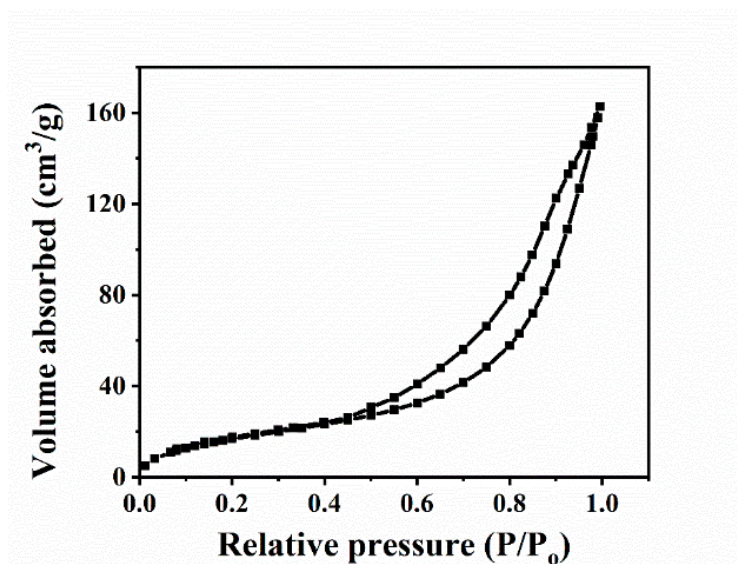

Figure S4. Nitrogen adsorption-desorption isotherms of the concave  $\text{Ni}(\text{OH})_2$  nanocubes.

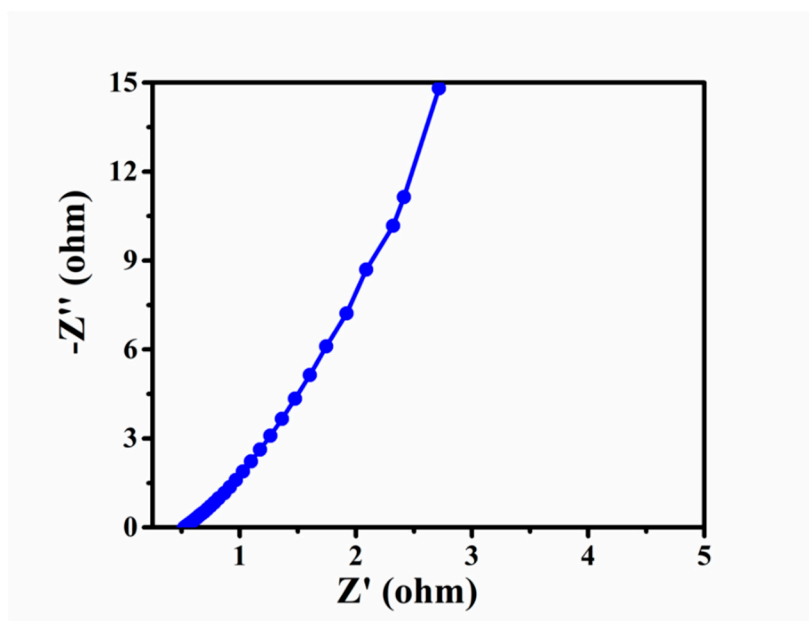

Figure S5. Nyquist plot of concave  $\text{Ni}(\text{OH})_2$  nanocubes.

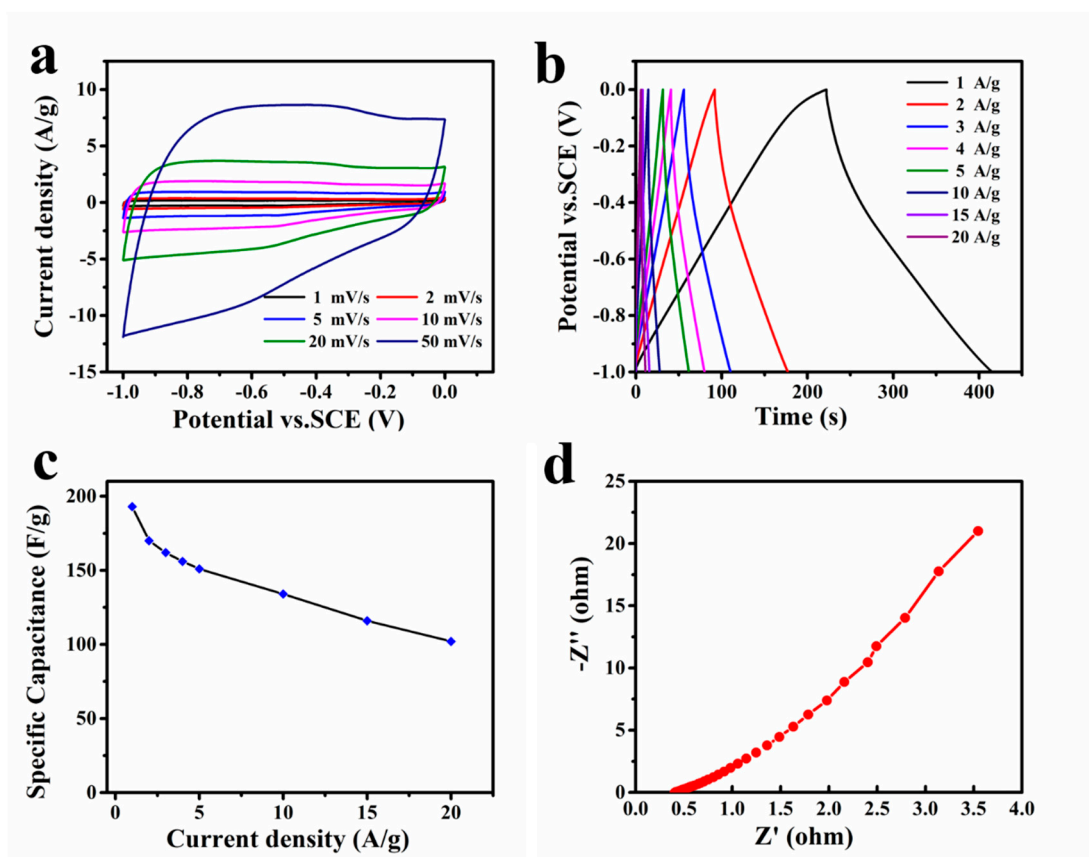

Figure S6. The electrochemistry properties of graphene: (a) CV curves at different scan rates, (b) Charge-discharge curves at varied current densities, (c) Specific

capacitances at a series of current densities, (d) Nyquist plot of graphene collected from the electrochemical impedance measurements.

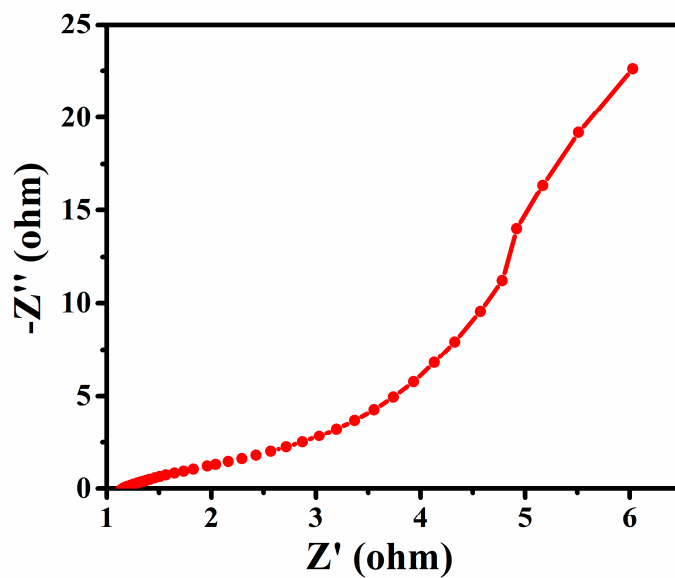

Figure S7. Nyquist plot for concave  $\text{Ni}(\text{OH})_2$  nanocubes//graphene hybrid capacitor.

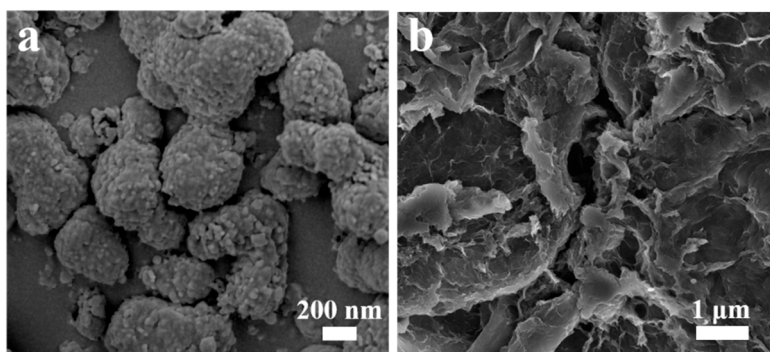

Figure S8. SEM image of concave  $\text{Ni}(\text{OH})_2$  nanocubes and graphene after 4000 cycles.
